# Supplementary material
Source: publisher site journal article supplement (https://www.dovepress.com/get_supplementary_file.php?f=446741.docx)
Supplement: Supplementary file 1 [file get_supplementary_file.php]

**Supplementary Material 1: Methods**

*1.1* The critical micelle concentration (CMC) of LeB-PSN

The CMC of LeB-PSN was determined using fluorescence probe pyrene as reported earlier 1. A series of samples of designed concentration of LeB-PSN solution with trace pyrene were determined by RF-5301 PC spectrofluorophotometer. Each solution was excited at 334 nm, and fluorescence spectra were recorded between 300 nm and 500 nm. The excitation slid width was set at 10 nm and the emission slit width was 5 nm. Intensity of peak 375 nm (I375) and peak 393 nm (I393) were obtained and all the fluorescence spectra were collected (Figure S2).

*1.2 The pharmacokinetic analysis in rats*

The animal experiments were approved and performed according to the guidelines of the Jiangsu Council on Animal Care. Nine (9) male SD rats (200 ± 20 g, n=3 for each group) were intravenously administrated with free bufalin in 1% Tween 80 PBS (pH=7.4), LeB-NPs and 8:2-NPs at a dose equivalent to 1 mg/kg of BFL respectively. In time controlled intervals (0.083, 0.25, 0.5, 1, 2, 4, 6, 8, 12 and 24 h), blood samples (500 µL) were collected and centrifuged after clotting to obtain the serum. Serum samples (200 µL each) were taken and added to 50 µL of 2 μg∙mL-1 Cinobufagin (internal standard). Then, ethyl acetate (1.2 mL) was added to the mixture, vortex mixed for 3 min and centrifuged at 3,000 rpm for 10 min. The organic upper layer was removed and dried with nitrogen at 40 oC on a water bath to obtain the residue, which was later reconstituted in 100 µL methanol and vortex-mixed for 3 min. Again, the sample was centrifuged at 20,000 rpm for 10 min and the supernatant was used in HPLC analysis. The mobile phase of bufalin consisted of acetonitrile and water (50:50, v/v, containing 0.3% acetic acid). The flow rate was 1.0 mL·min-1 and the detection wavelength was 296 nm. The retention time of bufalin and Cinobufagin was about 6.71 and 9.12 min, respectively. The mobile phase of LeB prodrug consisted of acetonitrile and methanol (50:50, v/v). The retention time of LeB prodrug was about 13.21 min.

**Figures**


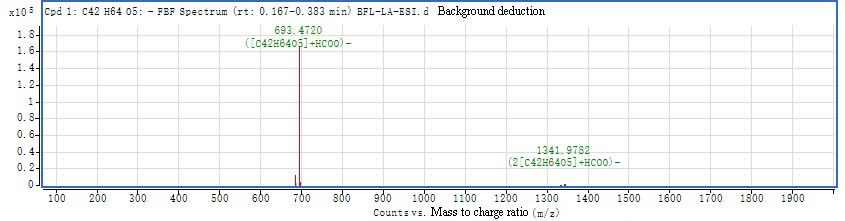


Figure S1. Mass spectrometry (MS) of LeB prodrug


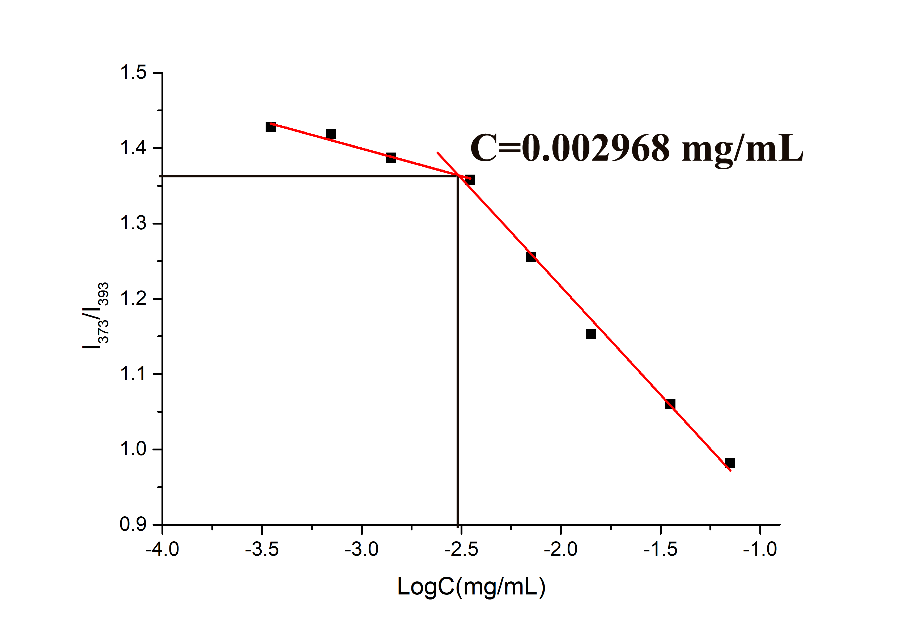


Figure S2. The critical micelle concentration (CMC) of LeB-PSN was measured by Fluorescence probes (pyrene). Intensity of peak 373 nm (I373) and peak 393 nm (I393).





Figure S3. The stability of PSNs in PBS (pH=7.4) solution contain 10% FBS at 37.5 ℃ for 24 hours


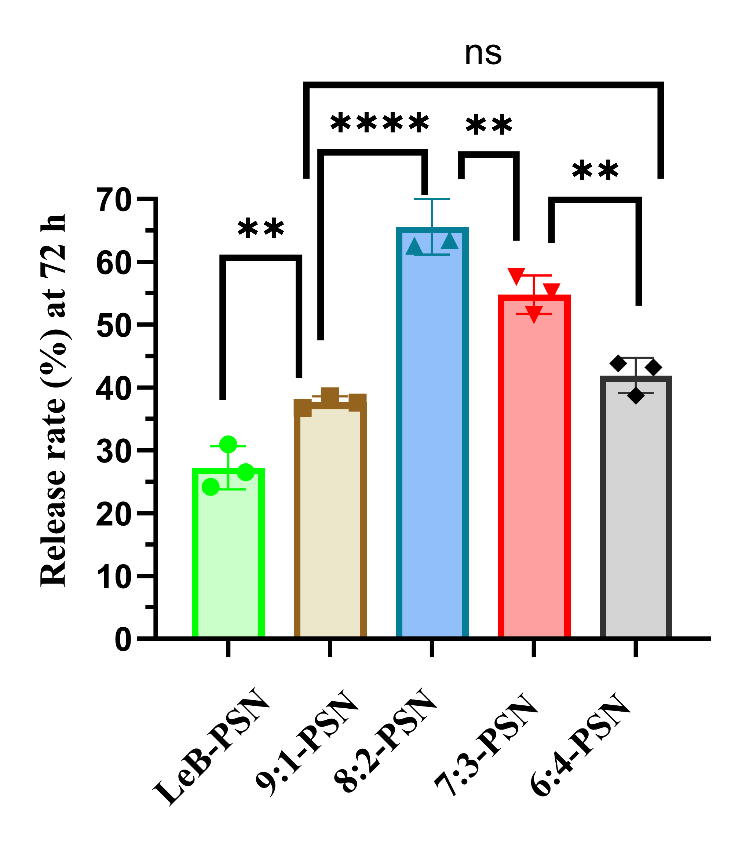


Figure S4. Release percentages of different nanoparticles after 72 hours under enzymatic conditions. One-way ANOVA (one-sided) with Dunnett’s multiple comparisons test was used for data analysis. where ns indicates no significance, **P < 0.01, and ****P < 0.0001.


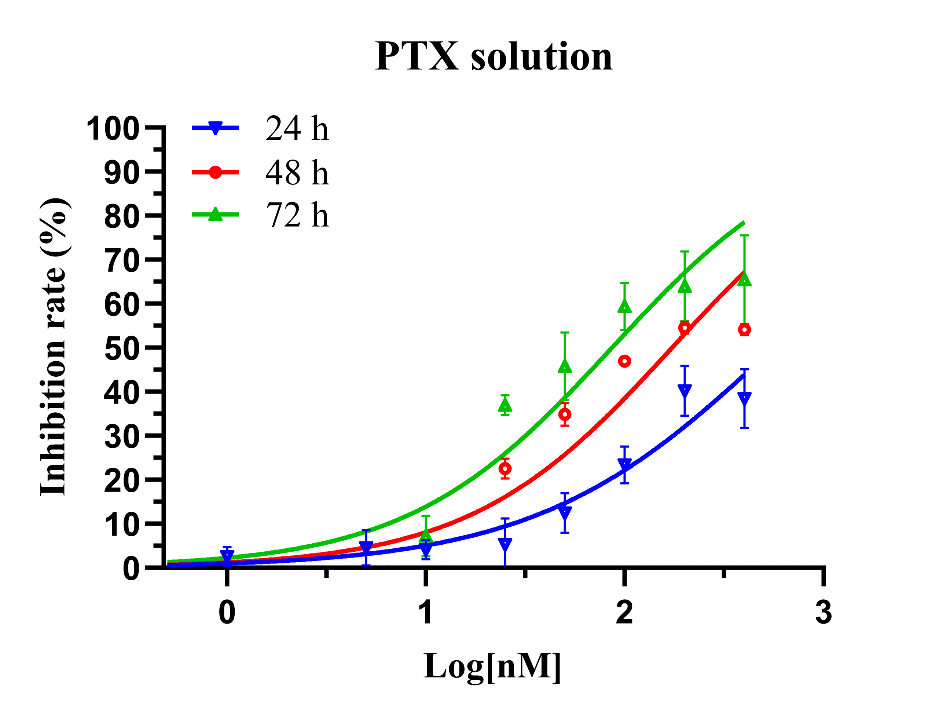


Figure S5. The cytotoxicity of Paclitaxel (PTX) at different time points (24, 48, and 72 hours).


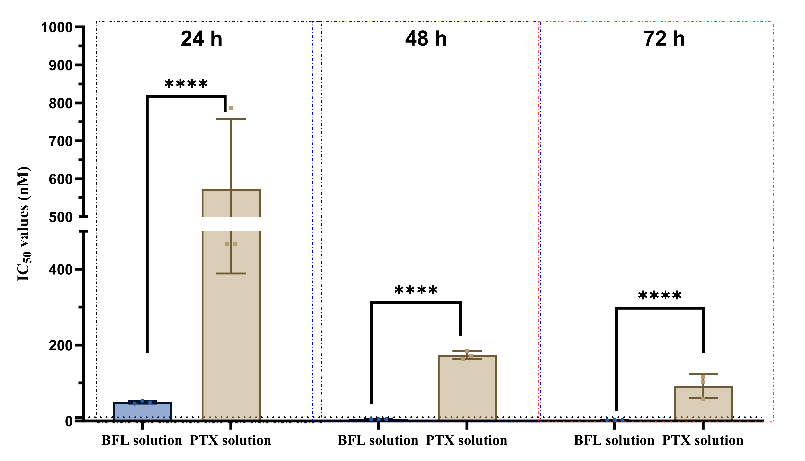


Figure S6. The IC50 of Paclitaxel (PTX) at different time points (24, 48, and 72 hours). Statistical analysis was performed using two-tailed Student’s t-test, *****P* < 0.0001.


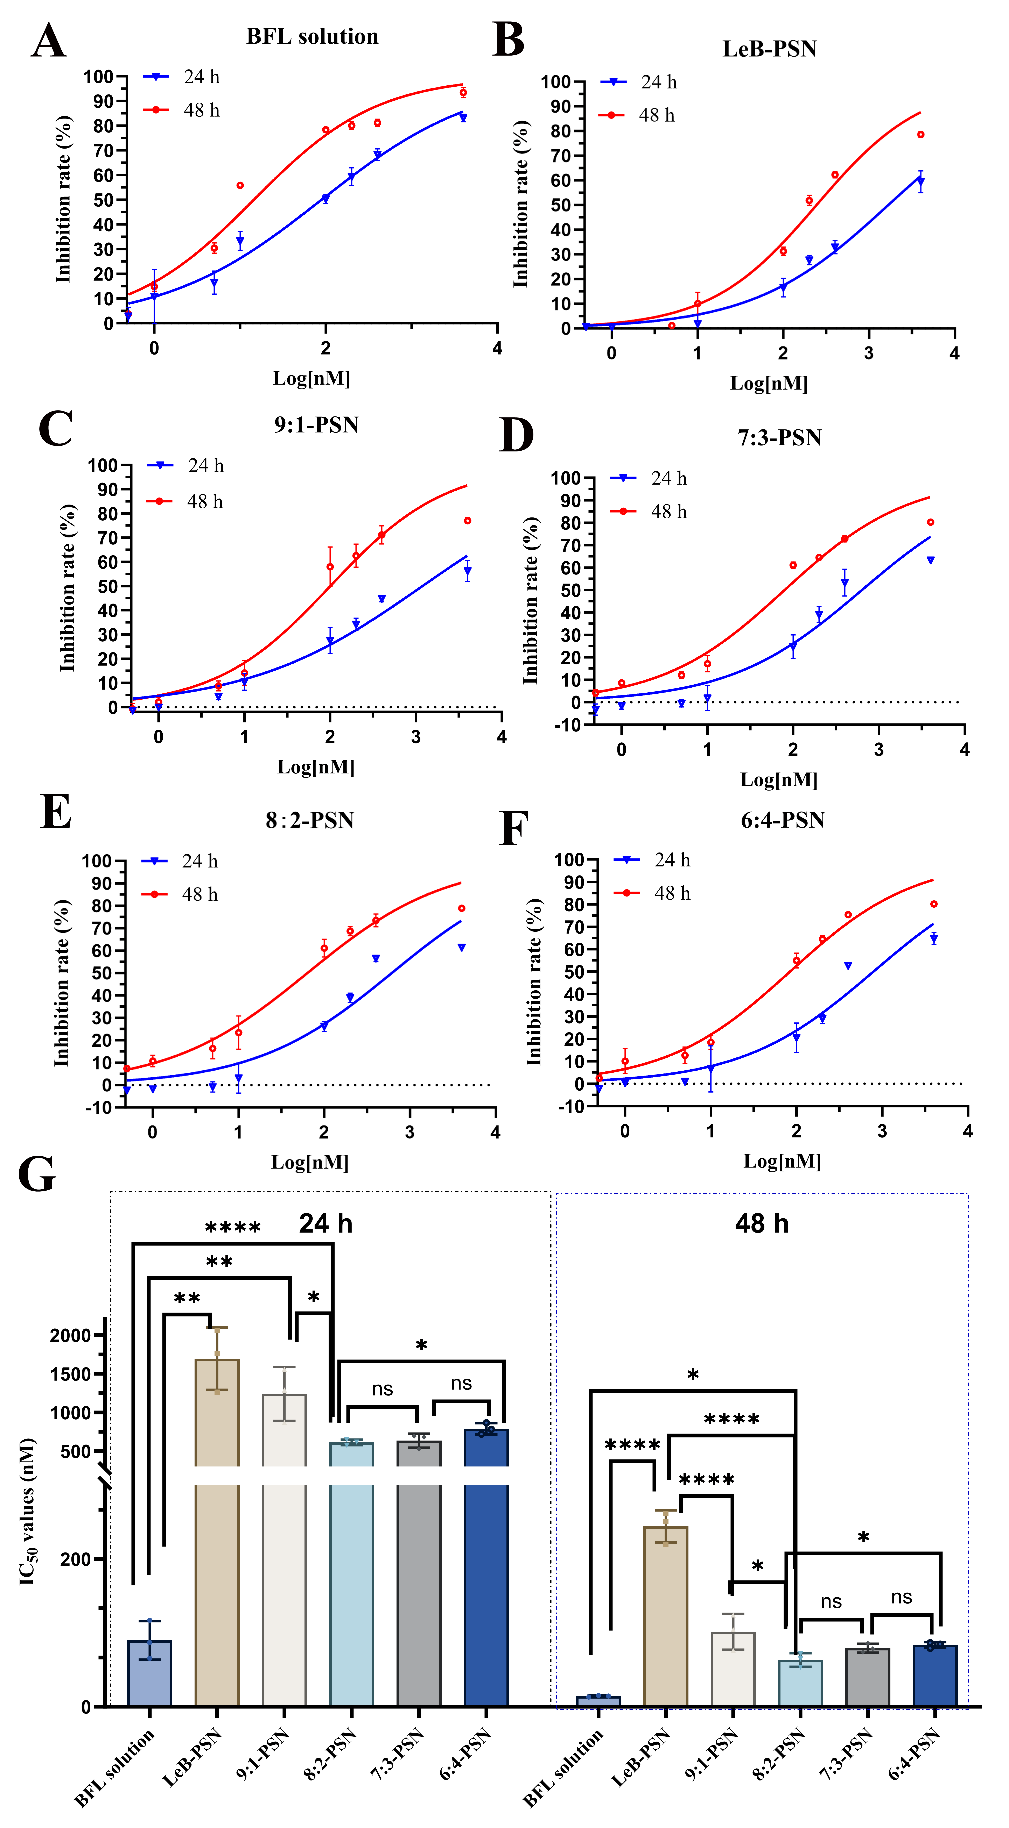


Figure S7. The cytotoxicity of Bufalin (BFL) and different nanoparticles on HEEC. (A-F) The cytotoxicity of free BFL solution, Leb-PSN, 9:1-PSN, 8:2-PSN, 7:3-PSN, and 6:4-PSN at different time points (24 and 48 hours). (G) The IC50 values of different nanoparticles on HEEC at different time points (24 and48 hours). One-way ANOVA (one-sided) with Dunnett’s multiple comparisons test was used for data analysis, where ns indicates no significance, *P < 0.05, **P < 0.01, and ****P < 0.0001.





Figure S8 Pharmacokinetics of LeB-PSN and 8:2-PSN after intravenous administration in rats. Pharmacokinetic proﬁles of the (a) the bufalin in blood, (b) the prodrug in blood, and (c) total equivalent Bufalin. All data of A-C were presented as mean ± SD (n = 3 rats).

Table S1. The drug loading content (DLC) of different PSNs

|  | Feed ratio  (WLeB/WDSPE-PEG2k) | Measured average ratio (WLeB/WDSPE-PEG2k) | DLC(%) |
| --- | --- | --- | --- |
| LeB-PSN | 10/0 | (9.98 ± 0.028)/0 | 99.8 ± 0.28 |
| 9:1-PSN | 9/1 | (8.8 ± 0.025)/1 | 89.8 ± 0.03 |
| 8:2-PSN | 8/2 | (7.9 ± 0.024)/2 | 79.8 ± 0.04 |
| 7:3-PSN | 7/3 | (6.8 ± 0.030)/3 | 69.5 ± 0.09 |
| 6:4-PSN | 6/4 | (5.9± 0.033)/4 | 59.4 ± 0.14 |

DLC (%) = Weight of prodrug in PSN/Weight of PSN × 100%.

Table S2. The relative cytotoxicity (the ratio values of IC50 to HEEC and KYSE150) of free BFL and PSNs

| Sample | Free BFL | LeB-PSN | 9:1-PSN | 8:2-PSN | 7:3-PSN | 6:4-PSN |
| --- | --- | --- | --- | --- | --- | --- |
| 24 h | 1.82 | 10.41 | 13.58 | 9.57 | 9.64 | 6.06 |
| 48h | 3.10 | 3.03 | 3.41 | 10.41 | 4.97 | 3.38 |

Table S3. Pharmacokinetic parameters of LeB-PSN and 8:2-PSN after intravenous administration in rats (mean ± SD).

| Parameters | Drug in blood | Cmax (nmol∙mL-1) | AUC0-t h (h∙nmol∙mL-1) | CL (L∙h-1∙kg-1) | t1/2 (h) |
| --- | --- | --- | --- | --- | --- |
| Free BFL solution | Bufalin | 2.17 ± 0.35 | 1.33 ± 0.19 | 1.85 ± 0.25 | 1.17 ± 0.14 |
| LeB-PSN | Bufalin | 0.75 ± 0.05 | 0.65 ± 0.34 | 5.49 ± 2.54 | 3.04 ±1.05 |
| LeB-prodrug | 5.23 ± 1.60* * | 0.67 ± 0.12 | 2.34 ± 0.37 | 0.58 ± 0.007* * |
| 8:2-PSN | Bufalin | 1.58 ± 0.23 | 3.51±1.26* * | 0.77± 0.25* * | 3.08 ± 0.94* * |
| LeB-prodrug | 45.95 ± 9.55* * | 146.38 ± 33.03* * | 0.011 ± 0.003* * | 4.56 ± 0.55* * |

* * p< 0.01, compared with free BFL solution

References

1. Zhang H, Wang Q, Sun C, Zhu Y, Yang Q, Wei Q, Chen J, Deng W, Adu-Frimpong M, Yu J, Xu X. Enhanced Oral Bioavailability, Anti-Tumor Activity and Hepatoprotective Effect of 6-Shogaol Loaded in a Type of Novel Micelles of Polyethylene Glycol and Linoleic Acid Conjugate. Pharmaceutics. 2019 Mar 6;11(3):107. doi: 10.3390/pharmaceutics11030107.
